# Supplementary material for: Towards Standardisation of a Diffuse Midline Glioma Patient-Derived Xenograft Mouse Model Based on Suspension Matrices for Preclinical Research
Source: MDPI journal article supplement (doi:10.3390/biomedicines11020527), 2023-02-11
Supplement: s1 [file s1]

## Supplementary Figures

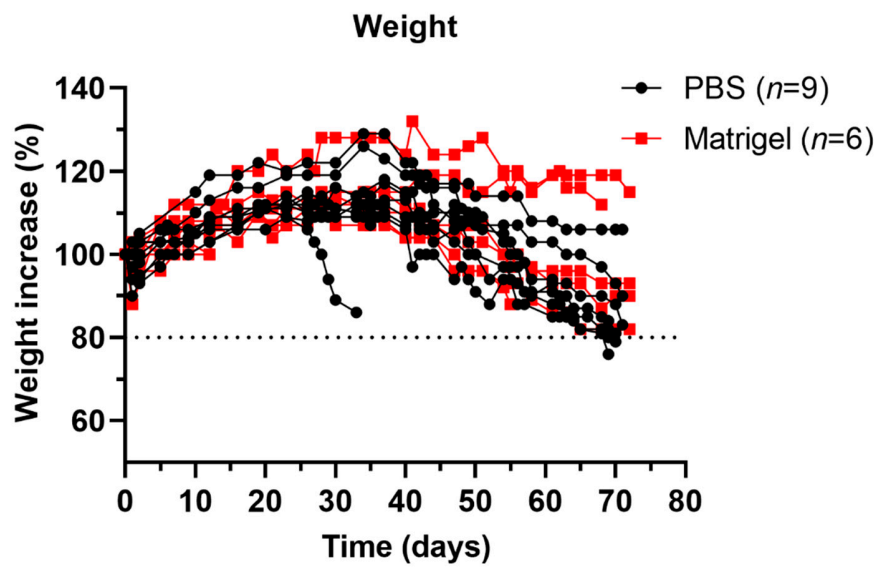

**Supplementary Figure S1: Weight profiles of individual mice after inoculation with HSJD-DIPG-007 cells suspended in PBS or Matrigel.** Weight was monitored until terminal endpoint. Dotted line represents humane endpoint threshold (representing 20% weight loss).

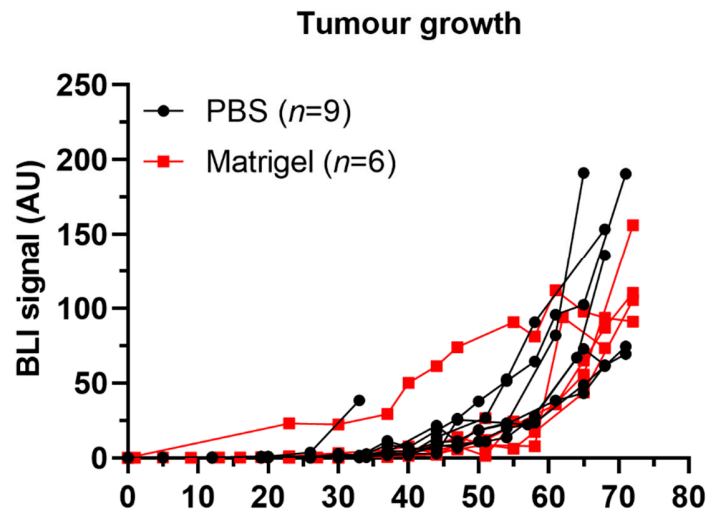

**Supplementary Figure S2: Tumour growth profiles of individual mice following inoculation with HSJD-DIPG-007 cells suspended in PBS or Matrigel.** Individual tumour volume over time in both PBS and Matrigel suspension groups shows comparable tumour growth up to 75 days.

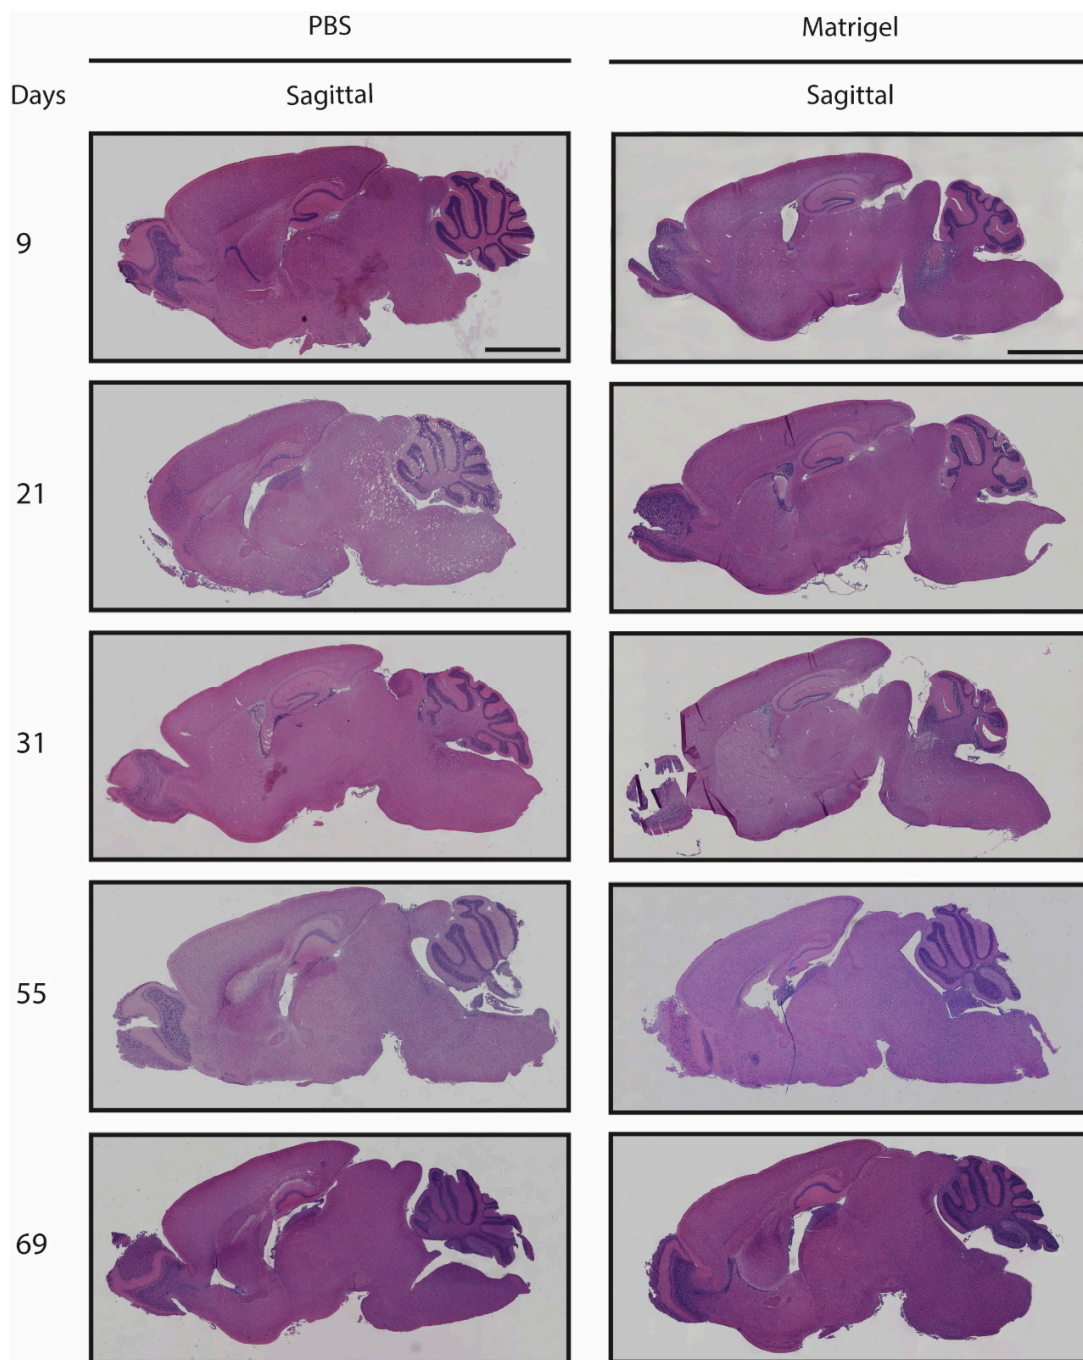

**Supplementary Figure S3: Haematoxylin & Eosin staining of mouse brains with tumour progression over time following inoculation with HSJD-DIPG-007 cells suspended in PBS or Matrigel. No apparent histological changes were observed over time. Scale bar = 2mm.**
