# Supplementary material for: Towards Standardisation of a Diffuse Midline Glioma Patient-Derived Xenograft Mouse Model Based on Suspension Matrices for Preclinical Research
Source: MDPI journal article supplement (doi:10.3390/biomedicines11020527), 2023-02-11
Supplement: s1 [file s1]

**Supplementary Table S1: List of conditions, materials, and manufacturers related to the in vivo experiments including living conditions, cage enrichments, food, water, and health monitoring of the animals by pathogen detection in the research facility.**

| Parameter          | Condition/Material                       | Manufacturer                                      |
|--------------------|------------------------------------------|---------------------------------------------------|
| Temperature        | 21 ± 1°C                                 | -                                                 |
| Relative Humidity  | 45 – 64%, TouchSLIM Plus™ AHU            | Tecniplast S.p.A., Buguggiate, Italy              |
| Lighting           | 12h light/dark (7 a.m. – 7 p.m.)         | -                                                 |
|                    |                                          |                                                   |
| Housing            | Specific Pathogen Free                   | -                                                 |
| Caging             | GM500 Mouse IVC (Green Line)             | Tecniplast S.p.A., Buguggiate, Italy              |
| Mice/cage          | Up to 4                                  | -                                                 |
| Bedding            | Aspen Wooden flakes                      | Bio Services BV, Uden, The Netherlands            |
|                    |                                          |                                                   |
| Diet               | ssniff® R/M-H (V153x), <i>ad libitum</i> | Ssniff Spezialdiäten GmbH, Soest, The Netherlands |
| Water              | Sterile, <i>ad libitum</i>               | Aqua B. Braun, Melsungen, Germany                 |
| Enrichment         | Tissue                                   | WEPA Professional GmbH, Müschede, Germany         |
|                    | Mouse Tunnel                             | Bio-Serv, San Diego USA                           |
|                    |                                          |                                                   |
| Pathogen detection | Dirty-bedding sentinels                  | -                                                 |
